# Supplementary material for: A Systematic Review and Meta-Analysis of Inpatient Mortality Associated With Nosocomial and Community COVID-19 Exposes the Vulnerability of Immunosuppressed Adults
Source: Frontiers journal article supplement (doi:10.3389/fimmu.2021.744696), 2021-10-06
Supplement: Data_Sheet_1.pdf [file Data_Sheet_1.pdf]

## Supplementary online material

### Contents

|                                                                                                                            |   |
|----------------------------------------------------------------------------------------------------------------------------|---|
| Supplementary S1: Extended Methods .....                                                                                   | 2 |
| Supplementary S2: Timing of non-UK studies included within primary meta-analyses relative to national COVID-19 rates ..... | 3 |
| Supplementary S3: Sensitivity Analyses .....                                                                               | 4 |
| Supplementary S4: Risk of bias assessment tools .....                                                                      | 5 |
| A: Newcastle-Ottawa Score (cohort studies).....                                                                            | 5 |
| B: Joanna Briggs Institute (JBI) tool (cross-sectional/prevalence studies) .....                                           | 6 |
| C: Joanna Briggs Institute (JBI) tool (case series).....                                                                   | 6 |

## Supplementary S1: Extended Methods

Individual study variance and heterogeneity variance were combined to calculate individual study weight:  $w_i = 1/(\tau^2 + \sigma^2)$ . Studies which reported no observed deaths in both community acquired or nosocomial COVID-19 groups were excluded from the analysis. When only one group reported no deaths, a figure of 0.5 deaths was used for the purpose of analysis. Assumption of normality for meta-analysis models was assessed using Q-Q plots. To establish whether an individual study had undue influence on the meta-analysis model, the 'influence' function in the R metafor package was used. Studies were judged influential if one of the following was true:

- The absolute DFFITS value is larger than  $3\sqrt{p/(k-p)}$ , where  $p$  is the number of model coefficients and  $k$  the number of studies.
- The lower tail area of a chi-square distribution with  $p$  degrees of freedom cut off by the Cook's distance is larger than 50%.
- The hat value is larger than  $3(p/k)$ .
- Any DFBETAS value is larger than 1.

We pre-specified the following sensitivity analysis:

- 1: Studies providing an explicit definition of nosocomial acquisition
- 2: Studies providing outcomes associated with a standardised >14 day definition for 'definite' nosocomial covid-19 (excluding probable cases).
- 3A: Excluding studies with a higher risk of bias, defined as studies with a score of 4 or less.
- 3B: Fulfilling all 5 core study quality domains (as indicated by \* within tables 2-4 or Supplementary S4).
- 4: Excluding studies with imputed data (i.e. 0.5 used in place of zero-count cells)

## Supplementary S2: Timing of non-UK studies included within primary meta-analyses relative to national COVID-19 rates

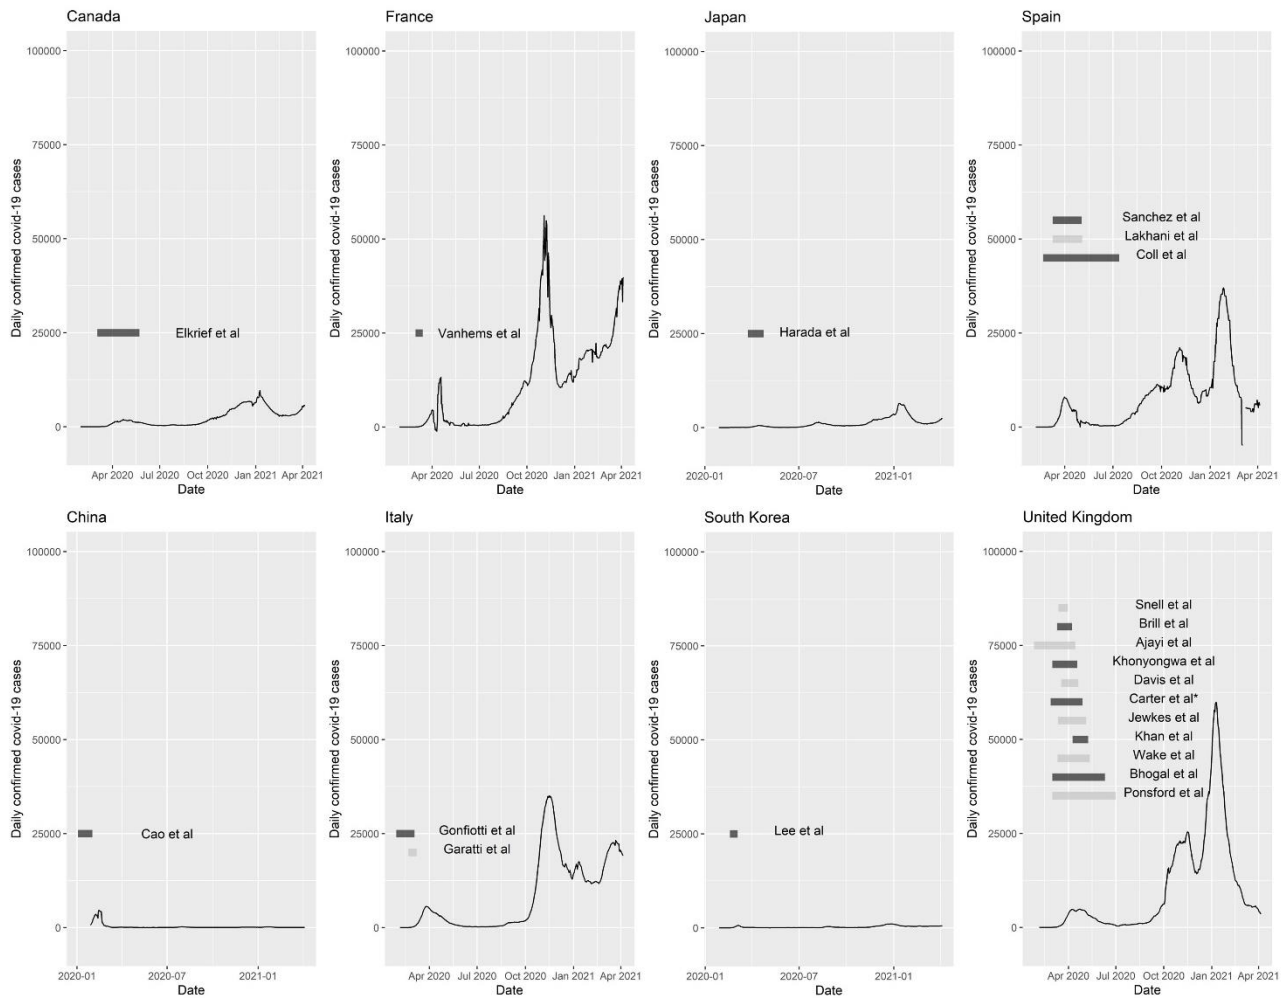

## Supplementary S3: Sensitivity Analyses

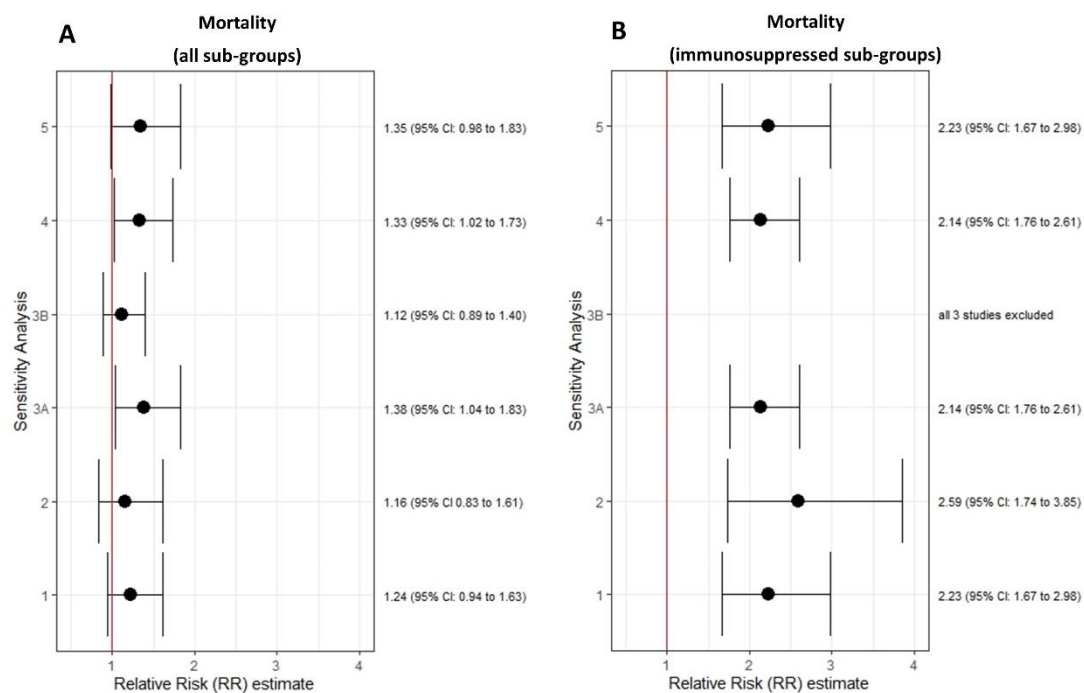

Forest plots showing the relative risk (RR, log estimate) and 95% confidence interval (95% CI) estimates for the relative risk of mortality in adults hospitalised with community-acquired and probable nosocomial COVID-19 applying pre-defined sensitivity analyses across **A**: subgroups or to **B**: immunosuppressed sub-group only. **1**: Studies providing an explicit definition of nosocomial acquisition; **2**: Studies providing outcomes associated with a standardized >14 day definition for 'definite' nosocomial covid-19; **3A**: Excluding studies with a higher risk of bias (indicated by total quality score <5); **3B**: Fulfilling all 5 core study quality domains (indicated by \* within tables 2-4, see main article); **4**: Excluding studies with imputed data (i.e. 0.5 used in place of zero-count cells). **5**: Considering only studies utilising RT-PCR as the primary diagnostic method for SARS-CoV-2.

There was no significant difference in the overall mortality analysis when studies without an explicit definition of nosocomial acquisition were excluded ( $n=19$ ,  $p=0.78$ ), however, removing these studies changed the overall relative risk for the difference between mortality from nosocomial and community acquired COVID-19 such that it no longer met the pre-defined 5% significance level ( $RR = 1.24$ , 95% CI 0.94 to 1.63,  $p= 0.13$ ). There was no significant difference in the analysis when only studies providing outcomes based on standardised >14 day definition for 'definite' nosocomial covid-19 were included ( $n = 8$ ,  $p= 0.54$ ), however the difference between mortality from nosocomial and community acquired COVID-19 no longer met the pre-defined 5% significance level ( $RR = 1.15$ , 95% CI 0.83 to 1.58,  $p= 0.40$ ). There was no significant change in mortality outcome when studies with a with "raw" risk of bias score of 5 or less were excluded ( $n=4$ ,  $RR = 1.39$  vs  $1.31$ ,  $p=0.76$ ). There was no significant difference in the analysis when studies with high risk of bias were excluded (defined as studies scoring across all key 5 domains, indicated by \* in Tables 2-4),  $n=12$ ,  $p=0.42$ , however the difference between mortality from nosocomial and community acquired COVID-19 no longer met the pre-defined 5% significance level ( $RR = 1.13$ , 95% CI 0.88 to 1.45,  $p= 0.34$ ). Excluding studies where data was imputed ( $n=3$ ) had no significant effect on the results ( $RR 1.34$  vs  $1.31$   $p=0.91$ ).

## Supplementary S4: Risk of bias assessment tools

### A: Newcastle-Ottawa Score (cohort studies)

|                                                                                                                                              |
|----------------------------------------------------------------------------------------------------------------------------------------------|
| *1) Representativeness of the exposed cohort [“nosocomial covid-19”]                                                                         |
| a) truly representative of the average nosocomial covid-19 case in the hospital (or wider patient group), 1                                  |
| b) somewhat representative of the average nosocomial covid-19 case in the hospital (or wider patient group), 0                               |
| c) selected group of users e.g. single ward or department; possible inclusion of children, nurses, volunteers, 0                             |
| d) no description of the derivation of the cohort, 0                                                                                         |
| *2) Selection of the comparator cohort [“community” covid-19 infection]                                                                      |
| a) drawn from the same population (e.g. ward, hospital, region) as the exposed [nosocomial] cohort, 1                                        |
| b) drawn from a different source (e.g. national dataset), 0                                                                                  |
| c) no description of the derivation of the non-exposed cohort, 0                                                                             |
| *3) Ascertainment of nosocomial covid-19 infection                                                                                           |
| a) secure record (e.g. medical records), 1                                                                                                   |
| b) structured interview, 1                                                                                                                   |
| c) written self report, 0                                                                                                                    |
| d) no description, 0                                                                                                                         |
| 4) Demonstration that outcome of interest was not present at start of study (SARS-CoV-2 infection prior to admission)                        |
| a) yes (universal screening present on admission), 1                                                                                         |
| b) no, 0                                                                                                                                     |
| <b>Comparability:</b>                                                                                                                        |
| 5) Comparability of cohorts on the basis of the design or analysis (for end-point of mortality)                                              |
| a) study controls for age, 1                                                                                                                 |
| b) study controls for any additional factor (e.g. frailty, or comorbidities differences between patient groups, e.g. multiple regression), 1 |
| c) study controls for multiple important factors, 2                                                                                          |
| d) no attempt to control for relevant factors, 0                                                                                             |
| <b>Outcome:</b>                                                                                                                              |
| 6) Assessment of outcome                                                                                                                     |
| a) independent blind assessment, 1                                                                                                           |
| b) record linkage, 1                                                                                                                         |
| c) self report, 1                                                                                                                            |
| d) no description, 1                                                                                                                         |
| *7) Was follow-up long enough for outcomes to occur (28 days or until discharge of diagnosis)                                                |
| a) Yes*, 1                                                                                                                                   |
| b) no (or not reported), 0                                                                                                                   |
| *8) Adequacy of follow up of cohorts                                                                                                         |
| a) complete follow up - all subjects accounted for, 1                                                                                        |

|                                                             |
|-------------------------------------------------------------|
| b) subjects lost to follow up unlikely to introduce bias, 1 |
| c) follow up rate < 80% and no description of those lost, 0 |
|                                                             |

**B: Joanna Briggs Institute (JBI) tool (cross-sectional/prevalence studies)**

|           |                                                                                                                                                                 |
|-----------|-----------------------------------------------------------------------------------------------------------------------------------------------------------------|
| Domain 1* | Were criteria for inclusion in the sample clearly defined?                                                                                                      |
| Domain 2* | Were the study subjects and setting described in detail?                                                                                                        |
| Domain 3* | Was the exposure (case definition nosocomial/community COVID-19) measured in a valid and reliable way?                                                          |
| Domain 4* | Were objective, standard criteria used for measurement of the condition? (use of secure medical records or linked datasets, e.g. RT-PCR testing records)        |
| Domain 5  | Were confounding factors identified? (e.g. Health care workers vs patients, age, frailty, treatments)                                                           |
| Domain 6  | Were strategies to deal with confounding factors stated?                                                                                                        |
| Domain 7* | Were the outcomes measured in a valid and reliable way? (mortality reporting based on follow-up 28 days since onset, or until death or discharge)               |
| Domain 8  | Was appropriate statistical analysis used? (e.g. use of multivariate analysis, at minimum: age-stratified mortality by nosocomial vs community COVID-19 origin) |

**C: Joanna Briggs Institute (JBI) tool (case series)**

|           |                                                                                                                                                   |
|-----------|---------------------------------------------------------------------------------------------------------------------------------------------------|
| Domain 1* | Were there clear criteria for inclusion in the cases series?                                                                                      |
| Domain 2* | Was the condition measured in a standard, reliable way for all participants (use of a standardised case definitions for community and nosocomial) |
| Domain 3  | Were valid methods used for identification of the condition for all participants (e.g. RT-PCR diagnosis)                                          |
| Domain 4* | Did the case series have consecutive inclusion of participants                                                                                    |
| Domain 5  | Did the case series have complete inclusion of participants                                                                                       |
| Domain 6  | Was there clear reporting of the demographics of the participants in the study                                                                    |
| Domain 7  | Was there clear reporting of the clinical information of the participants                                                                         |
| Domain 8* | Were the outcomes or follow up results of cases clearly reported (target: 28 days since onset, or until death or discharge)                       |
| Domain 9* | Was there clear reporting of the presenting sites(s)/clinic(s) demographic information                                                            |
| Domain 10 | Was the statistical analysis appropriate                                                                                                          |
